# Supplementary material for: Transport of graphene oxide nanoparticles in saturated sandy soil
Source: Royal Society of Chemistry journal article supplement (doi:10.1039/c4em00063c), 2014-01-01
Supplement: c4em00063c1.pdf [file c4em00063c1.pdf]

## Supplementary Information

Transport of Graphene Oxide Nanoparticles in Saturated Sandy Soil

Zhichong Qi,<sup>1</sup> Lunliang Zhang,<sup>1,2</sup> and Wei Chen<sup>\*,1</sup>

<sup>1</sup>College of Environmental Science and Engineering/Ministry of Education Key  
Laboratory of Pollution Processes and Environmental Criteria/Tianjin Key Laboratory of  
Environmental Remediation and Pollution Control, Nankai University, Wei Jin Road 94,  
Tianjin 300071, China

<sup>2</sup>Tianjin Environmental Protection Bureau, Fu Kang Road 17, Tianjin, 300191, China

\*Corresponding author

E-mail address: [chenwei@nankai.edu.cn](mailto:chenwei@nankai.edu.cn)

Phone/fax number: 86-22-66229516

***Procedures used to prepare samples for AFM analysis***

For each measurement, 5  $\mu\text{l}$  of a GO nanoparticles suspension was deposited onto a freshly cleaved mica surface and left to adsorb for 3 min. Additionally, 30  $\mu\text{l}$  of the background electrolyte solution, with which the GO nanoparticles suspension was prepared, was added to the liquid cell. The sample was scanned under tapping mode using a J scanner of a Veeco Multi-mode Nanoscope VIII AFM (Santa Barbara, CA) with a silicon nitride cantilever with sharpened pyramidal tip (OMCL-TR400PSA, Olympus).

Table S1. Fitted Parameters of Two-Site Transport Model from Breakthrough Results of Column Experiments

| Column No. | Porous medium | Pore-water velocity (m/d) | Background solution                   | Parameters of two-site transport model |                   |                              |       |
|------------|---------------|---------------------------|---------------------------------------|----------------------------------------|-------------------|------------------------------|-------|
|            |               |                           |                                       | $K_{att}$ (h <sup>-1</sup> )           | $S_{max}$ (mg/kg) | $K_{str}$ (h <sup>-1</sup> ) | $r^2$ |
| 1          | Lula soil     | 10                        | DI water                              | 3.54                                   | 0.105             | 0.0117                       | 0.996 |
|            |               | 10                        | 10 mM NaCl                            | 6.67                                   | 1.43              | 3.37                         | 0.995 |
|            |               | 10                        | 25 mM NaCl                            | 13.7                                   | 2.27              | 11.1                         | 0.969 |
|            |               | 10                        | 35 mM NaCl                            | 21.1                                   | 2.33              | 15.5                         | 0.970 |
|            |               | 10                        | 50 mM NaCl                            | 23.8                                   | 3.12              | 28.7                         | 0.968 |
| 2          | Sigma sand    | 10                        | DI water                              | 3.05                                   | 0.132             | 1.58E-05                     | 0.999 |
|            |               | 10                        | 10 mM NaCl                            | 9.74                                   | 0.384             | 0.0817                       | 0.994 |
|            |               | 10                        | 25 mM NaCl                            | 11.8                                   | 0.533             | 3.75                         | 0.998 |
|            |               | 10                        | 35 mM NaCl                            | 16.2                                   | 0.947             | 5.52                         | 0.995 |
|            |               | 10                        | 50 mM NaCl                            | 22.6                                   | 1.11              | 15.8                         | 0.985 |
| 3          | Lula soil     | 10                        | 1.5 mM NaCl                           | 8.97                                   | 0.122             | 0.547                        | 0.997 |
|            |               | 10                        | 0.5 mM CaCl <sub>2</sub> <sup>a</sup> | 14.3                                   | 0.338             | 5.49                         | 0.972 |
| 4          | Lula soil     | 10                        | 0.1 mM CaCl <sub>2</sub>              | 9.44                                   | 0.225             | 11.3                         | 0.999 |
|            |               | 10                        | 0.3 mM CaCl <sub>2</sub>              | 11.8                                   | 0.366             | 18.6                         | 0.993 |
|            |               | 10                        | 0.5 mM CaCl <sub>2</sub> <sup>b</sup> | 12.5                                   | 0.279             | 11.3                         | 0.991 |
| 5          | Sigma sand    | 10                        | 1.5 mM NaCl                           | 9.91                                   | 0.242             | 1.25E-04                     | 0.994 |
|            |               | 10                        | 0.5 mM CaCl <sub>2</sub>              | 20.4                                   | 0.664             | 3.39                         | 0.99  |
| 6          | Lula soil     | 10                        | 10 mM NaCl (pH 4.0)                   | 9.90                                   | 0.843             | 5.15                         | 0.965 |
| 7          | Lula soil     | 10                        | 10 mM NaCl (pH 7.0)                   | 4.10                                   | 0.209             | 0.148                        | 0.995 |
| 8          | Lula soil     | 10                        | 10 mM NaCl (pH 9.0)                   | 7.06                                   | 0.886             | 0.964                        | 0.994 |
| 9          | Sigma sand    | 10                        | 10 mM NaCl (pH 4.0)                   | 24.8                                   | 1.17              | 0.892                        | 0.955 |
| 10         | Sigma sand    | 10                        | 10 mM NaCl (pH 7.0)                   | 15.2                                   | 0.854             | 0.687                        | 0.996 |
| 11         | Sigma sand    | 10                        | 10 mM NaCl (pH 9.0)                   | 20.3                                   | 0.415             | 1.35                         | 0.990 |
| 12         | Lula soil     | 10                        | 10 mM NaCl                            | 13.8                                   | 0.37              | 0.755                        | 0.994 |
|            |               | 10                        | 10 mM NaCl + 10 mg/L SRHA             | 3.57                                   | 0.759             | 6.63                         | 0.975 |
| 13         | Lula soil     | 10                        | 35 mM NaCl                            | 9.09                                   | 1.61              | 2.16                         | 0.968 |
|            |               | 10                        | 35 mM NaCl + 10 mg/L SRHA             | 10.5                                   | 0.376             | 0.821                        | 0.991 |
| 14         | Sigma sand    | 10                        | 10 mM NaCl                            | 11.8                                   | 0.363             | 0.342                        | 0.953 |
|            |               | 10                        | 10 mM NaCl + 10 mg/L SRHA             | 2.97                                   | 0.109             | 0.179                        | 0.997 |
| 15         | Sigma sand    | 10                        | 35 mM NaCl                            | 17.3                                   | 0.853             | 11.0                         | 0.925 |
|            |               | 10                        | 35 mM NaCl + 10 mg/L SRHA             | 11.0                                   | 0.411             | 0.914                        | 0.929 |
| 16         | Lula soil     | 10                        | 10 mM NaCl                            | 14.5                                   | 0.585             | 2.24                         | 0.994 |
|            |               | 5                         | 10 mM NaCl                            | 4.99                                   | 0.567             | 1.94                         | 0.974 |
|            |               | 1                         | 10 mM NaCl                            | 0.402                                  | 0.501             | 1.18                         | 0.992 |
| 17         | Sigma         | 10                        | 10 mM NaCl                            | 9.66                                   | 0.267             | 0.205                        | 0.947 |

|      |   |            |      |       |        |       |
|------|---|------------|------|-------|--------|-------|
| sand | 5 | 10 mM NaCl | 4.10 | 0.209 | 0.148  | 0.995 |
|      | 1 | 10 mM NaCl | 1.03 | 0.251 | 0.0629 | 0.996 |

<sup>a</sup> Fitted  $s'_{\max}$  value is 1.05. <sup>b</sup> Fitted  $s'_{\max}$  value is 0.794.

Table S2.  $\zeta$  Potential Values of Working Suspensions of GONPs

| Solution chemistry        | $\zeta$ potential <sup>a</sup><br>(mV) |
|---------------------------|----------------------------------------|
| DI water                  | -49.0 ± 2.1                            |
| 10 mM NaCl                | -23.8 ± 0.4                            |
| 25 mM NaCl                | -23.2 ± 0.7                            |
| 35 mM NaCl                | -13.9 ± 0.8                            |
| 50 mM NaCl                | -14.6 ± 0.4                            |
| 1.5 mM NaCl               | -23.8 ± 1.2                            |
| 0.1 mM CaCl <sub>2</sub>  | -23.2 ± 1.2                            |
| 0.3 mM CaCl <sub>2</sub>  | -19.6 ± 0.4                            |
| 0.5 mM CaCl <sub>2</sub>  | -14.0 ± 0.9                            |
| 10 mM NaCl (pH 4.0)       | -21.9 ± 1.8                            |
| 10 mM NaCl (pH 7.0)       | -27.4 ± 0.9                            |
| 10 mM NaCl (pH 9.0)       | -27.4 ± 0.5                            |
| 10 mM NaCl + 10 mg/L SRHA | -21.4 ± 1.3                            |
| 35 mM NaCl + 10 mg/L SRHA | -17.8 ± 0.8                            |

<sup>a</sup> Values after ± sign represent standard deviation of five replicates.

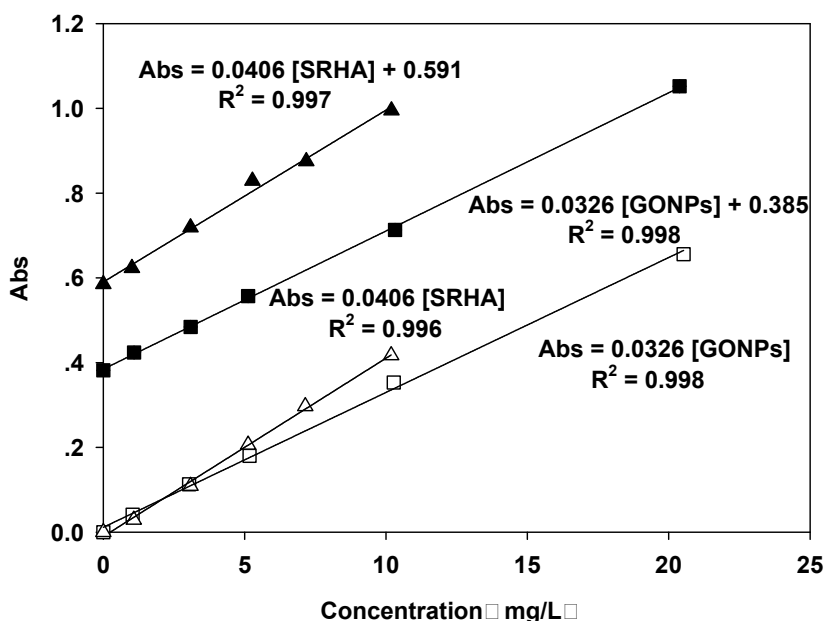

**Fig. S1** Calibration curves of GONPs and SRHA used to calculate the concentrations of GONPs in the presence of SRHA and vice versa.<sup>S1</sup> Hollow square (□): UV absorbance of GONPs (at 230 nm) as a function of GONPs concentration in the absence of SRHA. Filled square (■), UV absorbance of GONPs (at 230 nm) as a function of GONPs concentration in the presence of 10 mg/L SRHA. Hollow triangle (Δ): UV absorbance of SRHA (at 208 nm) as a function of SRHA concentration in the absence of GONPs. Filled triangle (▲): UV absorbance of SRHA (at 208 nm) as a function of SRHA concentration in the presence of 20 mg/L GONPs. According to Chen et al.,<sup>S1</sup> because the standard curves of GONPs in the absence and presence of SRHA have nearly identical slopes, the presence of SRHA does not interfere the determination of GONPs concentration; likewise, the identical slopes of SRHA in the absence and presence of GONPs indicate that the presence of GONPs does not affect the determination of SRHA concentration. The SRHA stock solution was prepared by dissolving 50 mg SRHA powder in 500 mL DI water and stirring overnight. The solution was filtered through 0.45- $\mu$ m filters and then kept in the dark at 4 °C.

(a) DI water

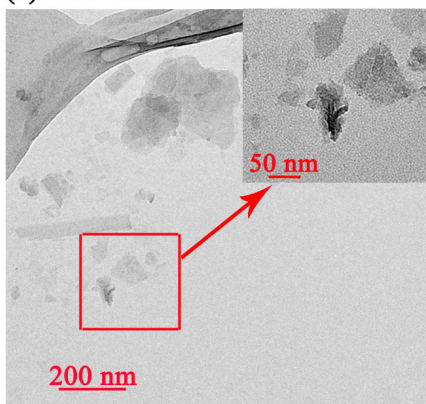

(b) 10 mM NaCl

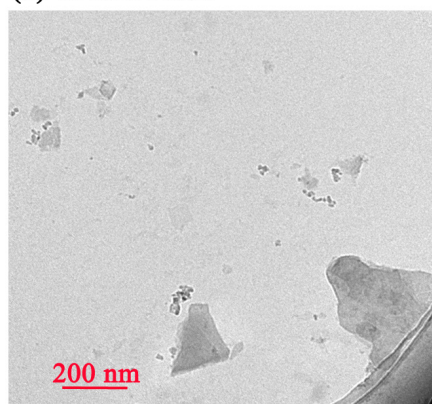

(c) 35 mM NaCl

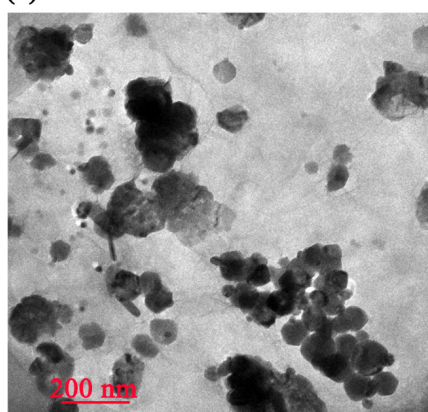

(d) 50 mM NaCl

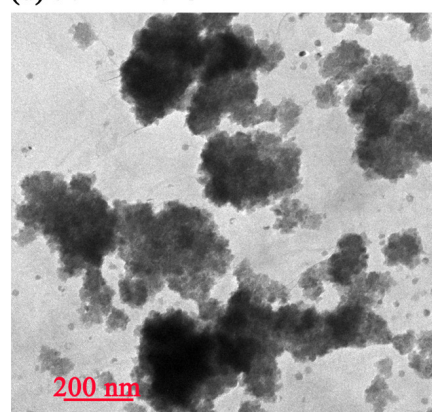

(e) 0.1 mM  $\text{CaCl}_2$

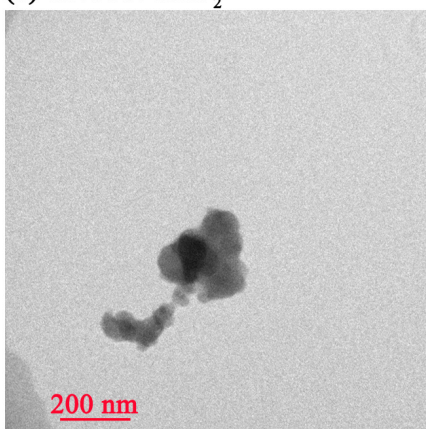

(f) 0.3 mM  $\text{CaCl}_2$

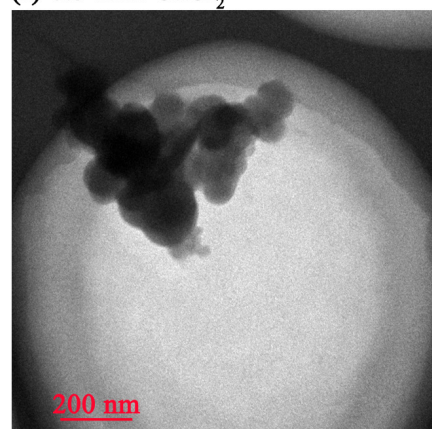

**Fig. S2 (part 1)** Representative TEM images of GONPs ( $\sim 20$  mg/L) under different solution chemistry conditions.

(g) 0.5 mM CaCl<sub>2</sub>

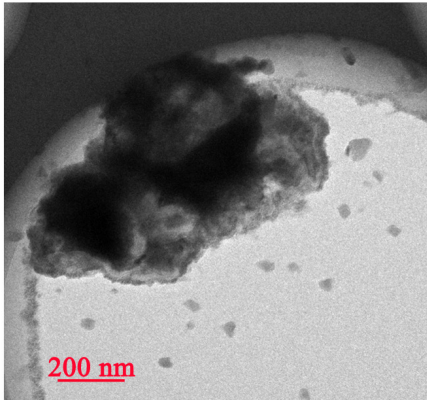

(h) 10 mM NaCl + 10 mg/LSRHA

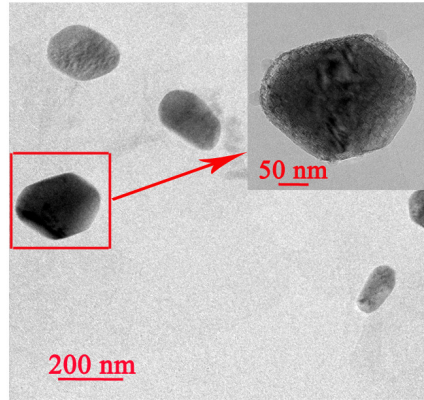

(i) 35 mM NaCl + 10 mg/LSRHA

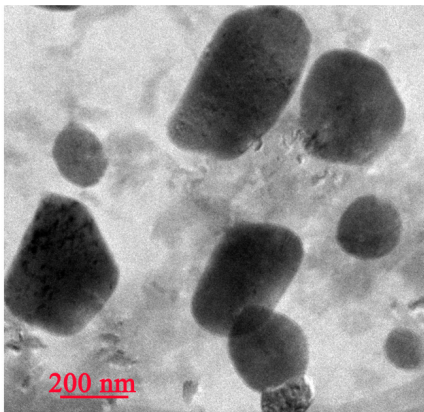

**Fig. S2 (part 2)** Representative TEM images of GONPs (~20 mg/L) under different solution chemistry conditions.



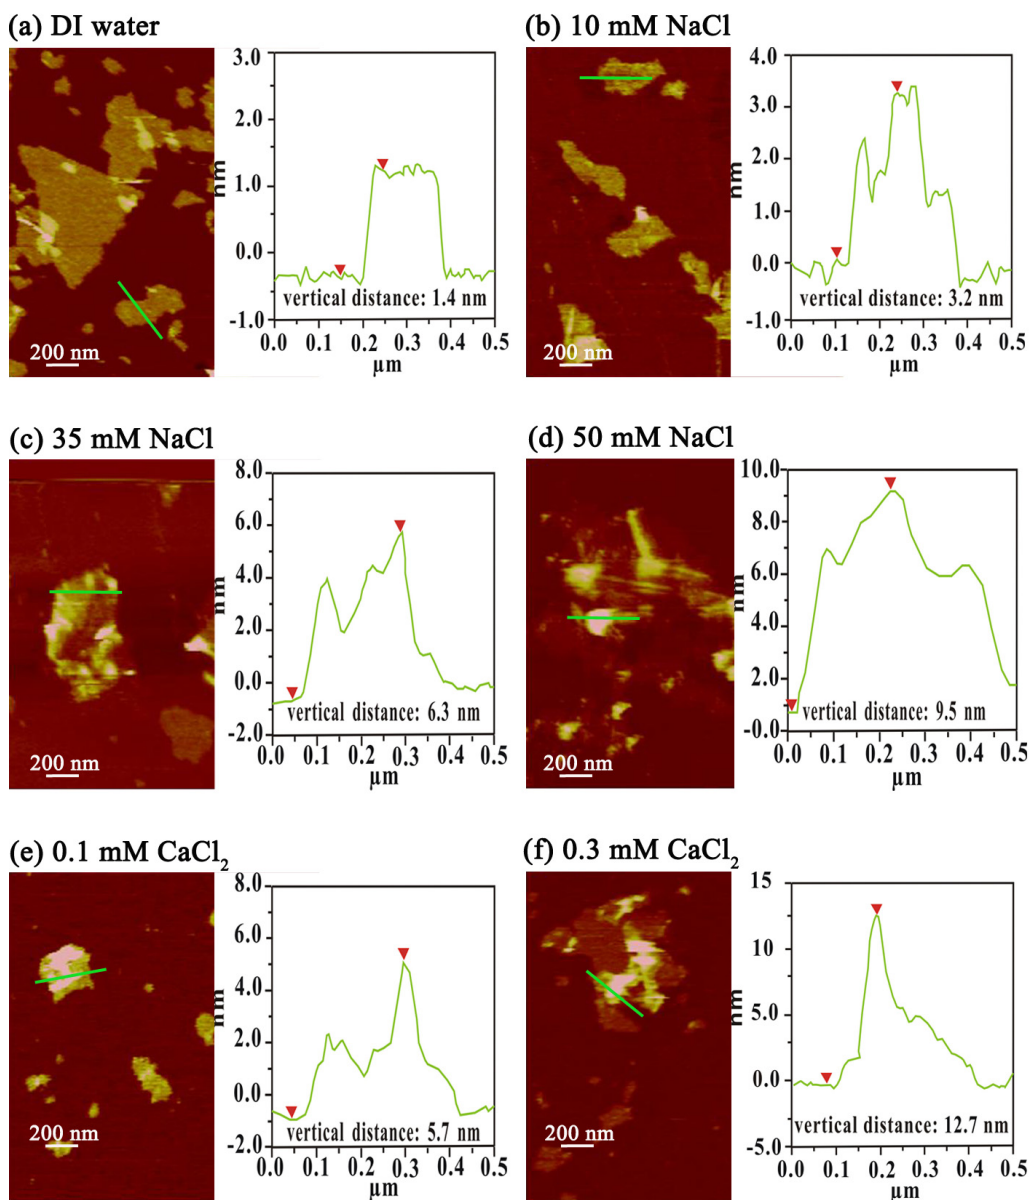

**Fig. S3 (part 1)** Representative AFM images of GONPs (~20 mg/L) under different solution chemistry conditions and associated cross-section analyses showing the thickness.

(g) 0.5 mM CaCl<sub>2</sub>

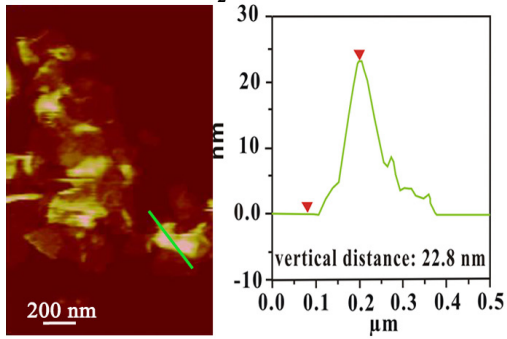

(h) 10 mM NaCl + 10 mg/L SRHA

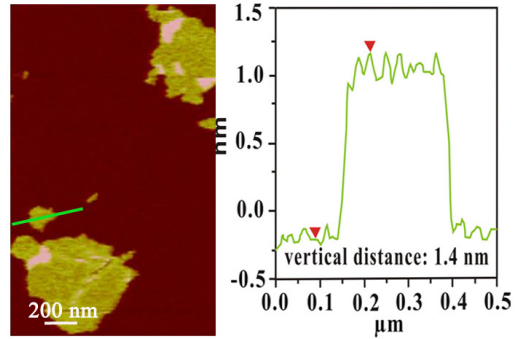

(i) 35 mM NaCl + 10 mg/L SRHA

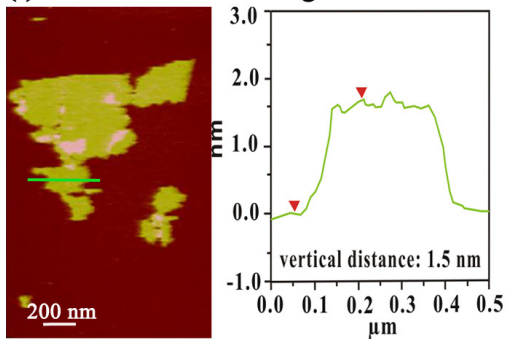

**Fig. S3 (part 2)** Representative AFM images of GONPs (~20 mg/L) under different solution chemistry conditions and associated cross-section analyses showing the thickness.

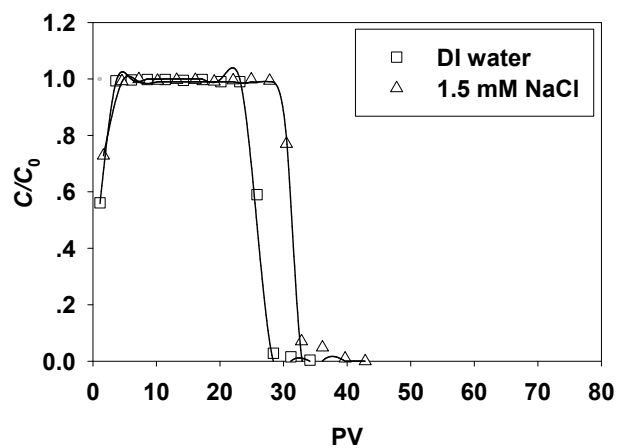

**Fig. S4** Comparison between BTCs of GONPs in Lula soil: the influent of one experiment was GONPs in DI water (Column 1); the influent of the other was GONPs in 1.5 mM NaCl (Column 3). Solid lines (—) was plotted by fitting the BTCs with the two-site transport model (Equations 1–5).

## References

- S1 G. Chen, X. Liu and C. Su, Distinct effects of humic acid on transport and retention of TiO<sub>2</sub> rutile nanoparticles in saturated sand columns, *Environ. Sci. Technol.*, 2012, **46**, 7142–7150.
